# Supplementary material
Source: publisher figshare collection journal article supplement (https://geolsoc.figshare.com/ndownloader/files/26181413)
Supplement: Supplementary file 1 [file 26181413]

## Sheet: Sheet1
S1		S2		S3		S4		S5		S6		S7		S8		S9		S10		S11		S12		S13		S14		S15		S16		S17		S18		S19		S20		S21		S22		S23		S24		S25
1657	2	1440	7.6	1880	0	1680	1.7	1220	6.9	1740	6.2	1230	2.3	1690	6.3	1870	6.6	2240	1.2	2130	2.4	1680	2.4	1800	7.2	1345.3	4.45923	1370	4.8	1180	0.5	1730	0.5	1390	10.8	1732	1.5	1760	0.5	1740	1.7	1800	2.3	1675	4.9	1800	5.8	1620	0.3
1197	4.2	1190	4.7	1741	4.2	1421	0.2	1756	2.4	1690	6.3	1430	0.3	448.7	2.90249	1730	0.5	3360	1.7	1760	3	1719	2.1	1430	1.6	1806	6.0207	1370	6.2	1360	5.2	1680	0	1687	1.7	1350	6.9	1230	6	1370	4.8	1657	2	1800	5.1	1760	0.1	1180	3.6
1759	7.3	1790	3.5	1180	1.1	1800	0.6	1741	0.7	1680	1.9	1680	1.2	1738.3	7.45839	2530	3.7	1211	8.6	1090	5.3	459.8	-16.5993	1760	1.5	1173.4	14.332	1400	6.2	1220	1.2	1820	8.5	1800	2.8	1960	1.1	1940	2.6	1330	4.9	1960	7.4	1400	1.7	2590	2.9	1250	6
1770	2.2	1720	1	1733	3.2	1416	0.3	1180	7.8	1783	3	1800	5.6	1026.9	1.85919	1180	1.9	1766	0.4	1766	2.5	423.1	0.564548	1766	0.4	628.8	-4.59923	1810	4.5	1657	6.4	389	4.2	1680	1.4	1197	5.3	1211	4.5	1150	8.4	1630	4.7	1777	0.2	1400	1.7	1675	5.5
1800	0.7	1880	4	1800	1.7	1960	4.6	2560	2.5	1110	3.5	1430	0.7	952.6	-4.2426	2723.5	4.75576	1741	4.2	1250	6.7	1155.5	3.37304	3360	1.7	416	-1.8	1440	6.3	1760	1.5	433	2.1	1680	1.7	1675	4.9	1800	3.2	1766	2.3	1675	3.3	1680	4.3	1766	1.2	1960	3.1
2480	1.2	1420	0.9	1680	0.7	1759	11.1	1440	2.3	1390	1.6	1783	7.2	1175.6	1.45434	457.6	-6.32077	1730	7.4	1675	5.6	1191.2	2.95452	1180	2.7	1329.4	4.2384	1790	3.4	1430	0.8	980	2.4	1460	6.8	1390	4.7	1760	1.6	1940	2.6	1520	9.6	1680	1.2	1732	4.6	1060	2.5
1741	6.1	1675	5.9	2070	0	1733	3.3	1657	6.9	1733	3.7	1777	0.2	461.5	-8.51816	1051	2.5	1430	3.6	1416	1.5	572.7	-8.72222	1800	9.4	1177	3.2	1190	2	1470	6.2	351	2.3	1800	1.4	1620	8.3	1680	0.6	1430	0.6	1421	4	1650	7	1732	6	1800	5.9
1732	0.9	1680	2.2	1770	0.2	1760	1.5	1759	6.1	1741	2.3	1720	0.7	2702	3.25614	443	-14.8	1741	4.1	1110	8.5	1169.6	2.50201	1900	8	457.6	-6.32077	1750	9.7	1720	0.7	470.5	1.3919	1870	1.9	1731	0.8	1675	0.7	1680	1.9	1420	0.3	1190	1.6	2440	4.4	1430	8.6
1450	6.6	1420	6.1	1430	1.2	1370	6.2	1800	0.9	1430	2.7	1410	7.4	1074	6.46777	464	-0.2	1190	6.1	1750	8.1	1343.4	7.49118	1211	2.5	592.3	2.43065	1732	0.9	2130	2.4	2720.8	5.47226	1830	5.7	1152	0.8	1370	4.8	1190	10.6	1211	5.2	1400	2.7	1657	2.3	1680	0.5
1390	4.1	1760	1.1	1770	2.2	1750	9.7	1705	5.8	1720	9.6	1733	3.3	2809	0.688448	1761.2	11.8395	1766	0	1655	1.1	456	-1.33922	1720	4.1	385.4	-0.950004	1190	5.5	1830	3.2	1018	-0.2	1766	0.7	468	5.1555	1657	3.7	1090	5.3	1777	0.2	1421	6.4	1810	4	1180	1.9
1675	5.2	1180	7.8	1800	10.3	1800	2.3	1620	0.3	1450	6.5	1390	4.7	1419	11.7064	1913	8.87957	1410	3	1657	0.9	409	0.5	1310	4.2	1024.7	8.16518	1190	4.4	1430	0.2	1013	4.6	1960	7.4	615	-10.4382	1430	0.3	1421	1.8	1430	1.2	1732	0.2	2310	0.2	1783	4
1710	10.4	1890	1.8	1732	0.9	1440	7.8	1430	5.6	1657	2.9	1680	0.2	1326	8.58769	1048	-1.24934	1430	0.3	1840	2.7	1029	4.41124	1150	3.9	1083.2	1.88694	1730	5.3	1800	0.7	425	-9.2	1190	2.7	427.3	-4.02252	1140	7.3	2070	0.4	1730	1.8	1733	3.2	1090	4.9	1657	0.3
3360	1.7	2570	0.2	1690	7.6	1370	7.5	1470	3.5	1687	5	1220	6.9	1461	8.56995	2783	4.00144	1680	3.1	1211	2.2	1031	3.4	1430	0.7	969.8	11.9021	1705	0.7	1230	5.9	385.4	-0.950004	1710	10.4	1082	0.1	1420	14.5	1680	0.8	1760	1.7	1211	2.2	1687	1.1	1655	1.8
1680	0	1200	16	1783	0.4	1760	0.6	1960	3.4	1655	4.3	1790	3.4	1187	2.74971	1032	7.44699	1800	7.2	1960	1	1253	0.8	1400	1.7	566	-6.04997	1800	8.2	1190	5.5	441	-9.8	1211	2.5	1155.3	6.47247	1430	5	1741	6.5	1220	11.1	1430	7.8	1720	9	1741	4.7
1680	1.6	1800	1.3	1003.1	-0.874874	1657	0.5	1490	11	1380	5.3	1800	9.1	2709	5.46678	1138	10.5695	1752	0.5	1680	0.7	615.1	-4.19748	1741	4.1	360	-1.4	1773	0.1	1741	6.1	996.4	2.82821	1800	3.3	1457.3	9.14862	1766	0.9	1800	1.3	1720	9	1330	8.6	1180	7.8	1766	1.2
1410	3	2350	0.7	3007.2	1.70811	1410	7.4	2270	0.6	1211	4.5	1440	7.8	1142	6.86818	1429	-7	1840	0.4	1810	3.1	1036.8	3.51332	1960	1.1	468	5.1555	1400	1.7	1190	4.3	1040	-0.3	1440	9.6	1058	0.5	1741	3.4	1420	14.5	1430	1.2	1420	3	1761	1.6	1840	4.2
1733	4.9	1766	0.7	543	5.9	1430	0.3	1220	7.6	1460	6.8	1080	5.2	2707	-13.4865	1696	0.09	1766	0.7	1340	4.8	592.3	2.43065	1030	10.5	1467.2	7.93956	1783	3.5	1779	0.2	1392.6	7.76151	1800	1.3	457.6	-6.32077	1211	2.2	1800	1.4	1766	3.2	1430	7	1800	1.9	1421	3
1657	2.9	992	-0.4	1012	7.27062	388	-4.6	1739	2.9	1760	1.5	1757	0.8	1162	2.82045	1697	-1.7	1760	1.5	1800	5.6	1112.4	3.20386	1680	0.2	453	-4.9	1705	7.9	1800	1.3	436	-7.2	1733	2.4	1055.4	0.969963	1520	9.6	1430	5	1330	8.6	1430	0.6	1741	4.1	1444.6	10.9558
1860	0.7	1026.9	1.85919	358	-6.7	484.8	0.364186	1800	1.9	1211	2.2	1800	1.7	1134	7.8171	1720	-3.03	1800	5	1089.9	4.37509	468.1	-12.3175	1416	2.1	995.7	2.23094	1440	6	1740	6.2	1364	3.86616	1680	1.2	1241.8	8.85804	1733	7.9	1750	5.4	1440	4.9	1040	2.7	1733	1.4	1193.9	4.53307
1730	0	455.9	4.87254	470	-3.1	1212.2	7.83783	1680	2.6	1830	1.7	1783	4.7	1140	4.12865	1743	3.61	1777	0.2	1170.4	9.72661	455.9	-12.7144	1405	1.9	1240.6	1.39878	1770	5.3	1960	1	2626	3.1145	1680	3.9	1333.1	3.95418	1211	2.5	1680	1.4	1800	1.3	1680	7.4	1675	5.2	1659.8	1.50631
1416	0.1	940.1	2.08045	1017	-0.6	936.1	-0.15191	1741	3.4	1800	0.2	1687	5.8	1048	-1.24934	1703	1.86	1490	7	412.6	0.461371	425	-9.2	1420	1.3	1155.3	6.47247	1460	14.5	1680	0.7	1142	6.86818	1220	11.1	612.6	2.82151	1167.2	2.09284	1800	2.3	1416	3.9	1761	1.6	1180	1.3	562	5.2
2130	2.4	1182.3	3.59054	397.9	-0.317749	413	-5.4	1680	0.7	1460	6.8	1160	2.7	1156	0.945806	1699	2.04	1330	4.9	461.3	-1.28824	414	-10.2	1150	2.4	430.5	-1.72277	1212.6	5.83606	1675	4.4	1061	2.98733	1470	0	1096.2	4.95781	1023	0.8	1430	0.3	1741	2.8	1619	4.2	1759	6.8	1152	2.5
1230	6.4	586	1.85844	940.1	2.08045	1333.1	3.95418	1820	9	1360	5	1740	0.9	1072	5.10116	1738	5.46	1783	8.1	443	-14.8	1238.4	6.68317	1430	1.1	963.4	1.03627	426.6	-1.28698	1657	2.3	2783	4.00144	1520	9.6	369	-0.5	1756.6	5.84136	1761	1.6	1790	3.4	1705	5.8	1037	1	1343.4	7.49118
1800	1.4	448.9	-18.339	417.3	1.86277	1061.6	2.70054	1759	6.8	960	5.6	1680	1.7	1120	8.92061	1779	9.55	1800	0.2	409	0.5	2708.1	-0.0522295	1680	2.2	415.7	5.2095	483.3	0.126906	1733	0.8	1172	2.65417	1800	0.4	435	1.1	2708.1	-0.0522295	1766	1.8	1630	5	1655	1.8	2718.4	-6.48146	1041	4.30581
1680	1.9	1113.5	6.67431	1457.3	9.14862	462.1	-10.7666	1760	4.1	1800	0.6	1840	4.6	1149	6.1825	1709	1.82	1840	2.7	2708.1	-0.0522295	486.1	1.17734	1740	1.7	455.4	2.37583	1240.6	1.39878	1759	6.4	1657	0.15847	1675	3.2	1155.5	3.37304	1028.2	6.41943	1582	0.2	1783	4	1730	6.3	1336.2	12.3473	1037	1
1960	1.1	1248.9	7.71275	1009	0.2	1096.7	3.25603	1800	9.1	1675	5.5	1430	3.7	1088	6.4378	1723	-12.46	1766	2.5	474.6	0.235551	1770.1	1.16472	1416	0.3	354	1	1934	2.3113	1750	6.3	1753	2.53	1687	3.7	448.7	2.90249	430	-2.1	1300	2.7	1430	1.2	1732	3.2	1156.6	2.2627	358	-6.7
1733	1.7	435	0.8	1006	-0.2	367.6	2.68175	1766	1.6	1440	6	1759	7.6	1783	-5.16617	1693	-1.18	1840	9	1168	3.87595	1649.1	4.26631	1737	3.4	468.1	-12.3175	1140	4.12865	1416	3.9	1706	2.94	1197	0.2	424.9	6.21039	452	-6	2600	1.5	1783	1.2	1440	7.8	1207.4	6.67807	448	-2.4
1737	3.4	1036.8	3.51332	1283	8.24218	448	-5.4	1637.5	5.8379	1800	9.9	1741	7.4	694	4.70079	1445	4.74	1730	6.3	452	-2	970.1	-8.017	1800	6.7	2724.2	-3.55994	1156	0.945806	1790	3.4	1718	-6.26	1655	2.4	461.8	-17.4661	1168	7.02581	1760	1.1	1940	2.6	2590	2.9	443	-14.8	378	3.5838
1790	3.4	420	-4.1	1171	4.43002	1153.9	5.43045	1022.3	6.81244	1741	1	1030	5.6	2780	4.76052	1728	6.56	1675	9.7	1000.3	2.7107	388.3	2.31966	1720	7.6	1371	9.30136	1419	8.26686	1675	0.3	1727	2.42	1190	6.7	615.1	-4.19748	2618	4.21702	1460	7.6	1430	2	1630	2.7	432	-6.6	1220.9	5.70447
1260	8.4	1453.4	6.69037	1434	7.07376	1155.3	6.47247	643.6	0.454289	1430	5.6	1620	0.3	1414	7.61918	1716	-0.19	1840	5.4	1472.6	-0.496939	351	2.3	1741	1.6	1766	8.5	1171	4.43002	2380	6.9	1709	1.82	1687	4.5	458.9	0.299217	1371	9.30136	1197	1.4	1680	1.2	468.2	4.04509	1083.2	1.88694	630.1	-1.59027
1156.3	10.1753	399.7	2.38106	1123	8.89466	1181.4	6.42892	1170.4	9.72661	1410	8.6	1400	4.4	1434	1.69679	1700	3.5	1220	6.8	1094.8	6.11748	447	-4.7	1870	1.7	1697	-1.7	1124	8.22529	1211	4.1	1723	-5.8	1370	6.8	1191.3	5.07894	1146	6.83512	1760	0.5	1160	2.7	359.5	-1.01746	572.7	-8.72222	1049	-0.2
1345.3	4.45923	1126	2.6	1280	10.7723	1254.7	4.85123	1493.3	5.76425	1840	4.2	1770	2.2	1704	4.83	1432	-7.76	1420	2.5	1096.2	4.95781	417	0.464527	1430	2.7	639	10.1	1283	8.24218	1680	2.7	1716	5.66	1210	4.3	351	2.3	1140	4.12865	1680	2.7	1340	4.8	937	3.49597	1181.4	2.52096	1091.2	3.6148
1622	2	354	1	2626	3.1145	1488.1	7.73626	1058	0.5	1582	0.2	1800	2.3	607	7	1717	4.95	1960	3.4	937	3.49597	988.4	4.723	1720	10.7	832	9	2809	0.688448	1405	1.8	554	-2.7	1733	1.4	1770.1	1.16472	1107	7.00373	1190	4.5	1687	3.9	1169.6	2.50201	1056.8	1.71432	488.2	-5.02113
554.7	-3.02358	1153.9	5.43045	1124	9.14967	370.3	0.580994	937	3.49597	1400	4.4	1000	5	719	10.4	1719	5.03	1687	1.1	456.1	-0.817538	2720.8	5.47226	1675	1.8	614	3.7	1187	8.57454	1800	2.3	602	7.2	2540	0	1673.7	7.94127	2702	3.25614	1783	3	1250	6	1017	-0.6	330	-5.45417	1112.9	11.2581
506	-9.2	1018	-0.2	1913	8.87957	431.9	-5.94177	423.1	0.564548	1760	0.8	3430	0.6	629	6.1	1715	1.03	1300	2.7	1003.1	-0.874874	484.8	0.364186	441	-9.8	610	7.7	1190	5.56461	990	8.1	592	8.7	2640	3.1	1188.8	7.61293	1835	-4.54455	1655	4.3	1680	1.7	2724.2	-3.55994	934.9	4.73363	429	-1
425	-9.2	462.1	0.419719	1314	8.74098	429	-1	457.3	1.23937	1733	1.7	1783	3	622	-1.9	1706	5.23	1410	8.6	1167.2	2.09284	419	-1.80735	1493.3	5.76425	618	6.8	1445	4.74	1766	1.6	608	2.3	1800	4.5	424	1.4	1424	11.3856	1440	4.5	1150	2.4	368	-13.2	1041	4.30581	1025	1.2
906	-3.5	1220.9	5.70447	1114	7.06141	1077	1.1	2809	0.688448	1680	1.2	1720	10.7	641	1.6	1696	0.45	1680	1.6	434.3	-5.61018	485.3	5.92186	1084.9	6.63586	623	6.7	1720	-6.66	2940	6.7	779	-33.6	1680	1.2	1025	1.9	1419	9.48475	1800	1.9	1190	10.6	1034	3.4	425	-9.2	1057	-0.0355788
1503.5	9.5828	382	-10.2	2780	1.88666	1025	1.2	1149	6.1825	1759	11.1	1741	0.8	602	8.5	1700	8.17	960	5.6	969.8	11.9021	426.6	-1.28698	419	-1.80735	628	6.6	1720	-3.03	1390	13.5	631	6.9	1620	8.3	506	-9.2	1120	8.92061	1657	4.2	1416	1.1	1013	4.6	1371.2	7.87418	2566.8	6.02524
980	2.4	637.7	-4.23444	2707	-13.4865	1023	0.8	2780	1.88666	1180	1.3	2520	0.8	616	4.7	1695	-0.75	1687	3.9	1488.1	7.73626	1041	4.30581	963.4	1.03627	588	9.4	1724	4.75	1470	3.5	572	3	1680	0.2	445.2	-2.03599	1175	2.09642	1800	0.6	1680	0.1	1056	4.68506	418.5	-7.93271	1276.8	11.8526
627.9	2.1611	448	-5.2	1434	1.69679	2829	6.43116	1187	8.57454	449.8	-0.828079	1675	4.9	606	6.9	1703	1.02	1657	0.9	2905	3.33044	471.3	-22.0111	1472.6	-0.496939	561	-1.3	1693	-1.18	1370	6.8	628	8.6	1430	2.5	311	-2.7	3164	-4.29221	1777	3.3	1410	6.2	1488.1	7.73626	376.2	1.69935	324	-4.2
360	-1.4	1488.1	7.73626	1419	11.7064	1171	4.43002	1175	2.09642	415.7	5.2095	1680	0.9	614	4.8	1704	-0.22	1420	2	1048	-1.24934	1588.4	6.90085	641.4	-3.3238	616	4.7	1695	1.79	1211	2.2	629	6.1	1340	5.1	1000.3	2.7107	1152	4.90436	1211	2.2	1730	2.1	506	-9.2	969.8	11.9021	1155.3	6.47247
448	-5.4	1045	2.2	1447	3.9328	1156	0.945806	1366	6.53624	2708.1	-0.0522295	1680	4.3	628	5.8	1704	0.13	1310	10.8	1424	11.3856	1012	7.27062	1155.5	3.37304	646	8.2	1733	4.72	1197	0.2	605	1.5	1687	4	1253	0.8	1913	8.87957	2090	2.7	1750	8.1	1018	-0.2	372.2	0.219288	424	1.4
1169.4	6.55909	380.9	3.96718	1107	7.00373	1124	8.22529	2701	0.702694	414	-10.2	1740	1.7	629	3.7	1702	4.15	1780	1.5	1078	4.77773	414	2.1	424	1.4	602	4	1723	-12.46	1440	6.2	633	7.2	1420	0.9	617.4	3.1171	1252	-1.72662	1675	2.6	1220	7.6	1037	1	1036.2	3.80985	1084.9	6.63586
949.5	2.5469	311	-2.7	1134	7.8171	1387	10.5204	1280	10.7723	1155	5.58981	1190	4.7	623	6.7	1723	-5.8	1741	1.6	1414	7.61918	1156.6	2.2627	1248.9	7.71275	2160	3.7	1695	-0.75	1760	1.2	587	10.1	1180	3.9	628.8	-4.59923	1124	8.22529	1400	6.2	1421	1	1054.7	3.4499	1090.7	5.95382	1193.2	4.78159
407	4.9	364.8	-3.63537	1124	8.22529	1139	7.57128	1190	5.56461	921.7	-0.643069	1680	3.8	577	8.6	1706	2.94	1400	1.7	1140	4.12865	1112.9	11.2581	637.7	-4.23444	637	9.1	1738	5.46	1675	9.7	605	9.5	1760	1.8	416	-1.8	1280	10.7723	1230	8.1	1390	5.4	1040	-0.3	710.6	7.14653	439.9	-0.166463
1444.6	10.9558	1006	-0.2	1418	8.79822	1123	8.89466	1107	7.00373	1112	-1.3	1783	6.3	621	6.7	1425	1.24	1810	4	1447	3.9328	369	-0.5	1453.7	-1.70731	620	2.5	1673	1.3	1017	-0.6	614	3.7	1760	1.8	1042	2.3	1737	4.33	1430	0.3	1405	3.5	455.8	-0.781394	448	-5.2	485.3	5.92186
435	1.1	324	-4.2	1711	-0.1	1162	2.82045	1718	-0.247413	1034	3.4	1220	6.8	628	6.6	1696	-3.23	1840	0.5	1237	9.77517	1178.2	7.53876	431.9	-5.94177	589	2.1	1697	-1.7	354	1	617	6.9	1800	3.2	532.4	-5.56364	1719	7.61	1180	2.7	1211	2.2	448.7	2.90249	1503.1	7.31931	1647.6	2.63389
1152	0.8	1169.6	2.50201	1727	2.42	1283	8.24218	3164	-4.29221	458.9	0.299217	2310	0.2	1241	20.8	1698	7.9	1720	1	1708	0.66	418.5	-7.93271	1088	-2.52645	594	3.4	1696	-1.12	1057	-0.0355788	626	-1.3	1210	6.4	1647.6	2.63389	617	4.8	1250	23.5	1760	1.9	1498.1	4.16195	451	0.2	940.1	2.08045
1023	1.1	1012	7.27062	1734	5.12	1440	1.5526	2626	3.1145	1488.1	7.73626	1190	5.5	600	10	1704	4.83	1070	2.3	1703	1.55	463.6	-14.7663	2780	1.88666	587	10.1	1708	7.29	1177	3.2	644	-22.3	1705	0.7	1639	6.45617	575	4.1	1960	1	1680	4.2	628.8	-4.59923	1169.8	6.33566	1336.2	12.3473
1659.8	1.50631	1416	-3.3	1699	2.04	1326	8.58769	1072	5.10116	1000.3	2.7107	1211	8.9	618	9.1	1714	7.4	1790	3.5	1704	0.13	1155	5.58981	2626	3.1145	631	6.8	1722	4.38	456.1	-0.817538	571	3.9	1810	4.1	1453.4	6.69037	631	6.6	1741	0.4	1687	1.2	424.2	6.1387	1069.3	2.8018	1718	-0.247413
434.3	-5.61018	1240.6	1.39878	1696	-3.23	1934	2.3113	2709	5.46678	1967	-5.0843	1680	0.2	628	5.8	1739	-9.25	1720	9	1708	7.29	434.3	-5.61018	1074	6.46777	560	-0.7	1719	5.03	1253	0.8	633	7.2	1741	6.5	359.5	-1.01746	645	9.8	1680	2.6	1680	1.2	1761.2	11.8395	1084.9	6.63586	2768	7.4875
1167.2	2.09284	1191.2	2.95452	1687	3.51	1175	2.09642	1168	7.02581	1387	10.5204	1657	0.9	615	8.1	1720	-6.66	382	-10.2	554	-2.7	1057	-0.0355788	1687	3.51	2655	-1.7	1718	-6.26	1241.8	8.85804	617	4.8	1760	1	1036.8	3.51332	619	8	1737	3.4	1810	1.9	470.5	1.3919	1498.1	4.16195	1967	-5.0843
970.1	-8.017	1699.7	5.32762	1718	-6.26	1088	6.4378	1434	7.07376	1152	4.90436	1741	3.8	600	10	1695	-2.03	1084.9	6.63586	638	1.3	2626	3.1145	1708	7.29	615	6.5	1703	1.02	368	-13.2	586	2.8	1779	0.2	412	-0.8	621	6.1	1680	1.2	1070	7	1195	0.8	1089.6	3.56522	1054	4.57419
2702.4	-0.152403	448	-2.4	1651	3.8	1142	6.86818	1419	11.7064	1414	7.61918	1733	3.7	620	5.9	1753	2.53	448	-5.4	610	7.7	1175	2.09642	1467	-4.66	628	2.3	1715	1.03	630.1	-1.59027	621	6.7	1800	0.6	1078	4.77773	1651	3.8	1440	4.9	2520	1.9	1303	3.7	455.8	-0.781394	1146	6.83512
484.8	0.364186	461.5	-16.4059	639	10.1	2783	4.00144	1708	4.11	1832	-2.16553	1760	0.5	2235	3.8	1725	7.36	1167.2	2.09284	626	-1.3	832	9	1716	-3.14	635	4.7	1692	1.37	562	5.2	604	2.8	1732	4.6	1434	1.69679	633	7.2	995.7	2.23094	1783	3.5	1175.6	1.45434	461.3	-1.28824	1698	-2.67
1018	-0.2	376.2	1.69935	604	6.3	2780	1.88666	1703	-4.23	1467	-4.66	1190	4.6	615	8.1	1722	4.38	456	-2	560	-0.7	608	6.8	1708	4.11	633	7.2	1424	-8.43	404	1.3	628	8.6	1766	6.5	1283	8.24218	615	5.5	1152	2.5	1260	8.4	1113.5	6.67431	1637.5	5.8379	1714	7.4
992	-0.4	3007.2	1.70811	577	8.6	1190	10.0169	1388	0.84	1709	1.82	1680	2.9	609	7.2	1740	-3.72	1012	7.27062	607	7	621	3.2	1704	0.13	609	5.3	1725	-6.11	1126	2.6	601	9.8	1800	2.2	992	2.58493	624	2.5	461.5	-8.51816	1040	5.6	592.3	2.43065	1031.6	3.31772	1703	1.02
364.8	-3.63537	1784.7	1.99323	654	6.5	1419	11.7064	1696	0.45	1695	-2.03	1840	2	644	7.4	1709	-0.53	409	0.5	655	-0.7	609	7.2	1695	-0.75	615	8.1	1709	-7.15	1036.8	3.51332	641	1.6	1680	0.5	1175	2.09642	615	0	354	1	1732	0.9	1240.6	1.39878	1130.4	5.72072	1739	-3.4
375	-2.6	757.7	-1.47889	591	3.5	2905	3.33044	1729	4.97	1725	7.36	1675	4.4	655	-0.7	1709	-1.99	435	1.1	583	-0.1	719	10.4	1698	7.9	614	4	1704	-0.22	1718	-0.247413	2235	3.8	1780	1.5	1028	6.38987	1929	-1.9	1212.1	2.6413	1180	1.3	1416	-3.3	468.1	-12.3175	1714	-0.26
378	3.5838	1212.6	5.83606	595	5.9	1366	6.53624	1432	-7.76	1722	4.38	1190	1	631	6.8	1716	5.66	412.5	3.14345	608	4.4	640	5	1698	-2.67	641	1.1	1740	-3.72	1175	2.09642	647	8.2	1405	0.9	1419	11.7064	598	5.9	1503.1	7.31931	1687	3.5	3007.2	1.70811	412.5	3.14345	1724	4.75
1045	2.2	486.1	1.17734	739	-5.8	1187	2.74971	1704	0.13	1716	-0.19	2280	3.3	589	2.1	1424	-8.43	431.2	-1.57345	613	6.3	618	7.9	1737	4.33	633	7.5	1723	-5.8	1447	3.9328	607	7	1440	6.3	1782	3.37659	640	5	1046.6	3.56828	1760	20.1	1036.2	3.80985	1012	7.27062	1739	-9.25
1024.7	8.16518	446.6	9.06902	617	10.1	1105	4.96044	1715	1.03	1706	5.23	1741	4.4	571	3.9	1737	4.33	430	-2.1	575	8.8	617	4.8	1715	1.03	594	3.1	1694	1.37	1696	0.45	610	6.8	1820	0.6	1723	-12.46	605	1.5	1254.7	4.85123	1150	4.3	1031	3.4	637.7	-4.23444	1703	-4.23
463.6	-14.7663	1472.6	-0.496939	628	6.6	1048	-1.24934	1723	-5.8	1719	5.03	1680	3.8	635	6.9	1388	0.84	2702.4	-0.152403	621	6.7	609	8.2	1693	-1.18	620	5.9	1697	0.51	1714	7.4	594	-26	1350	6.9	1695	1.79	601	9.8	586	1.85844	1800	5.9	414	2.1	1161.3	7.10113	1687	3.51
349	-2.3	1000.3	2.7107	636	10.6	1032	7.44699	1739	-3.4	1700	3.5	1120	4	566	2.4	1739	-3.4	1453.7	-1.70731	635	1.2	605	5.9	1709	-0.53	651	9	1677	-0.85	1697	0.51	594	3.1	1800	5.8	1733	4.72	620	2.8	2720.8	5.47226	1470	0	1012	7.27062	407	4.9	1703	1.55
368	-13.2	969.8	11.9021	2655	-1.7	2709	5.46678	1720	-3.03	1703	1.86	1639	6.45617	633	7.5	1673	1.3	963.4	1.03627	610	7.7	623	11	1727	-4.25	631	6.9	1706	2.94	633	7.5	621	6.1	1190	5.6	1699	0.72	580	2.6	359.5	-1.01746	1960	3.4	1336.2	12.3473	354	1	1708	0.66
1212.6	5.83606	949.5	2.5469	644	7.4	2707	-13.4865	610	7.7	1708	0.66	630.1	-1.59027	639	10.1	1709	-7.15	641.4	-3.3238	570	3.1	572	3	1718	-6.26	600	10.9	1743	3.61	635	4.7	2655	-1.7	1410	10.4	1718	-6.26	609	7.2	470	-3.1	1400	3.4	1023	1.1	585.7	-12.4935	1709	-7.15
1207.4	6.67807	1074	6.46777	644	-22.3	1657	0.15847	576	3.3	1694	1.94	1314	8.74098	560	-0.7	1695	1.79	461.8	-17.4661	612	5.1	585	10.2	1723	-5.8	618	7.6	1697	5.17	609	7.2	586	5.3	1680	2.7	1708	0.66	608	6.8	418	2.7	1290	7.5	1193.2	4.78159	455.9	4.87254	1733	4.72
2702	3.25614	1168	7.02581	626	3.5	1719	5.03	583	-0.1	1715	1.03	2701	0.702694	584	10.8	1766	8.5	1034	3.4	2160	3.7	584	10.8	1753	2.53	621	4.3	1711	-0.1	640	5	640	5	1741	3.8	1703	-4.23	832	9	1191.3	5.07894	1370	4.8	1637.5	5.8379	430.5	-1.72277	1432	-7.76
1054	4.57419	1801	2.17263	625	2.4	1753	2.53	628	5.6	1698	7.9	1280	10.7723	588	6.8	1694	1.37	355	-0.9	1272	4.1	615	6.5	1734	5.12	626	-1.3	1709	1.82	566	2.4	575	8.8	1766	3.2	1720	-6.66	613	6	1023	1.1	1405	0.6	330	-5.45417	1756.6	5.84136	1725	-6.11
1425	1.24	1078	4.77773	608	6.8	1696	0.09	609	7.2	1432	-7.76	1252	-1.72662	734	2	1727	2.42	1177	3.2	611	6.1	600	10.9	1699	2.04	565	-18.8	1709	-0.53	618	2.4	651	9	1680	0.2	1694	1.37	616	5.5	612.6	2.82151	1440	3.2	388	-4.6	1761.2	11.8395	1699	0.72
1718	-6.26	2783	4.00144	621	6.7	1727	-4.25	576	7.1	1708	4.11	1934	2.3113	578	3.1	1708	0.66	628.8	-4.59923	619	7.5	617	6.9	1388	0.84	634	6.6	1719	7.61	626	2.5	604	7.4	1156.3	10.1753	1696	-3.23	628	-0.7	360	-1.4	1197	3.2	425.2	7.13285	940.1	2.08045	1720	-6.66
1708	7.29	1934	2.3113	590	5.7	1716	-0.19	642	3.9	1737	4.33	1458	7.67344	626	3.5	1725	-6.11	452	-2	626	6.5	612	4.7	1673	1.3	1217	-2.6	1779	9.55	566	2.6	611	6.1	1453.7	-1.70731	1696	-1.11	607	11.9	757.7	-1.47889	1400	1.6	466.7	5.14355	430	-2.1	1718	-6.26
651	9	1156	0.945806	615	7.5	1673	1.3	615	5.5	1727	2.42	1414	7.61918	575	12	1692	1.37	1048	-1.24934	605	1.5	610	6.8	1695	-2.03	602	8.5	1695	-2.03	580	2.6	560	-0.7	1447	3.9328	1737	4.33	609	7.2	447	-4.7	1910	5.8	1045	2.2	412	-0.8	1723	-12.46
626	6.5	1692	1.37	617	6.9	1720	-3.03	719	10.4	1703	1.55	1081	7.2887	640	4.3	1696	-1.11	2707	-13.4865	637	6.4	617	5.3	1696	-3.23	608	6	1698	4.3	613	6.3	591	3.5	1419	11.7064	1739	-9.25	623	11	415.7	5.2095	1800	0.5	1659.8	1.50631	1832	-2.16553	1704	4.83
605	9.5	1697	5.17	610	5.9	1698	4.3	599	9.5	628	8.6	1832	-2.16553	628	6.6	1467	-4.66	1072	5.10116	602	4	570	3	1700	8.17	610	5.9	1708	0.66	586	5.3	1458	-2	1146	6.83512	1695	-0.75	589	2.1	627.9	2.1611	1880	0.7	484.8	0.364186	1419	8.26686	1694	1.94
630	6.5	1702	4.15	626	-1.3	1716	-3.14	571	7.4	640	4.3	1032	7.44699	561	-1.3	1677	-0.85	1801	2.17263	571	3.9	644	-22.3	1709	1.82	639	8	1703	-4.23	616	4.7	586	1.6	1371	9.30136	1402	-7.9	609	8.2	427.3	-4.02252	1460	6.8	2103	2.1	992	2.58493	1727	-3.05
687	3.6	1703	-4.22	650	9	1718	-6.26	616	10.7	586	2.8	1078	4.77773	585	3.3	1718	-6.26	1283	8.24218	723	3	635	1.2	1702	4.15	1651	3.8	1728	6.56	602	4	615	5.5	1124	9.14967	1698	4.3	587	10.1	1588.4	6.90085	2940	6.7	1089.6	3.56522	1107	7.00373	1711	-0.1
613	6	1703	-4.23	622	-1.9	1723	-5.8	607	4.7	566	2.4	2711	-1.23034	635	4.2	1719	7.61	1088	-2.52645	615	8.1	2655	-1.7	1704	-0.22	1929	-1.9	1714	-0.26	577	8.6	2220	-3.5	1032	7.44699	1425	1.24	588	9.4	2780	4.76052	1655	1.1	468	5.1555	1364	3.86616	1694	1.37
593	0.5	1729	4.97	601	9.8	1709	-0.53	566	2.4	612	6.4	1467	10.2788	608	6.8	1729	4.97	1467	10.2788	615	9.6	628	5.8	1703	-4.23	619	7.5	1739	-3.4	578	3.1	637	4.5	1388	0.84	1779	9.55	1239	4.1	1086	7.5667	1655	1.8	1202.7	11.3678	1782	3.37659	1709	-1.99
617	5.3	1687	3.51	613	6.3	1677	-0.85	617	10.1	655	-2.4	1237	9.77517	645	9.8	1741	3.79	1366	6.53624	603	6.1	613	6	1720	-6.66	635	6.5	1467	-4.66	1036	1.3	575	8.9	1695	-0.75	1727	-0.13	572	3.9	1090	1.71868	1800	7.3	1025	1.2	1967	-5.0843	1239	4.1
604	3.9	1696	-1.12	615	5.5	1702	4.15	1217	-2.6	633	7.2	1123	8.89466	578	2.5	1687	3.51	1364	3.86616	644	-22.3	607	5.2	1402	-7.9	595	1.9	1739	-9.25	617	6.9	631	6.6	1703	1.55	1698	-2.67	592	8.7	1434	1.69679	1773	0.1	1280	10.7723	2709	5.46678	628	6.6
605	6.1	1716	-0.19	1476	2.1	1697	0.51	630	6.5	624	2.5	1061	2.98733	583	-0.1	1716	-3.14	1123	8.89466	611	6.1	619	6.8	1694	1.94	577	8.6	583	-0.1	616	10.7	739	-5.8	1697	-1.7	1695	-2.03	639	11.7	2702	3.25614	1680	3.3	2829	6.43116	2780	4.76052	625	2.4
2220	-3.5	1714	-0.26	575	8.8	635	6.5	615	6.5	635	4.2	2783	4.00144	586	5.3	1712	1.99	1458	7.67344	591	3.5	555	-2.4	1714	7.4	640	5	628	2.3	1414	-1.5	594	3.4	1743	3.61	1727	-4.25	598	5.8	1074	6.46777	1069.3	2.8018	1782	3.37659	1088	-2.52645	618	7.9
594	5.9	623	11	618	7.6	606	6.9	615	8.1	575	8.8	2905	3.33044	571	7.4	1696	-1.12	2783	4.00144	651	9	575	8.9	1445	4.74	610	5.9	1414	-1.5	618	7.9	592	8.7	1698	4.3	1709	-0.53	619	6.8	1694	1.94	562	5.2	1326	8.58769	1054	4.57419	642	3.9
624	2.5	618	6.8	647	8.2	613	-0.4	616	4.7	625	2.7	1718	-0.247413	779	-33.6	1703	-4.22	2829	6.43116	642	3.9	616	10.7	1695	1.79	638	1.3	566	2.6	562	4.1	608	6.8	1708	4.11	646	8.2	616	10.7	1706	2.94	1009	0.2	1703	1.02	2809	0.688448	631	6.8
1239	4.1	612	4.7	628	5.6	589	7.7	627	3.8	639	10.1	2780	1.88666	613	-0.4	1734	5.12	1371	9.30136	595	5.9	626	2.5	1743	3.61	633	7.2	650	9	589	4.4	598	5.8	1704	4.83	570	3.1	589	7.7	1424	-8.43	1072	5.10116	1719	5.03	2618	4.21702	570	3
623	6.7	562	2.2	618	7.6	623	11	607	7	1651	3.8	1714	-0.26	2655	-1.7	617	7.2	1124	8.22529	589	7.7	621	6.7	1709	-7.15	628	5.7	586	2.8	609	3.9	623	11	1703	1.86	617	5.3	611	6.1	1718	-6.26	1187	2.74971	629	6.1	1146	6.83512	719	10.4
618	7.6	614	4.8	755	8.3	615	5.5	602	4	647	8.2	1704	-0.22	575	8.8	613	4.3	1156	0.945806	607	4.7	562	3.4	1716	-0.19	620	2.8	615	7.5	628	6.6	628	6.6	1696	0.09	630	6.5	626	-1.3	1723	-5.8	1048	-1.24934	600	10.9	1171	4.43002	723	3
579	4.1	581	5.7	602	8.5	575	4.1	615	9.6	589	2.1	567	-1.1	1241	20.8	594	3.4	1698	7.9	618	7.6	655	-0.7	667	3.3	609	8.2	621	6.7	570	3	588	6.8	1718	-6.26	560	-0.7	633	7.2	1741	3.79	650	9	832	9	1387	10.5204	600	3.8
581	5.7	604	3.9	628	6	576	3.3	608	4.4	1476	2.1	615	5.5	640	5	577	8.6	1716	-0.19	609	3.9	607	11.9	647	8.2	639	10.1	1241	20.8	600	10.9	635	6.5	1709	-7.15	611	6.1	616	4.7	589	4.4	562	3.4	603	6.1	1124	8.22529	572	3
584	5.1	602	8.5	641	1.6	739	-5.8	618	7.9	581	5.7	1929	-1.9	593	0.5	612	4.7	1738	5.46	654	6.5	593	0.5	579	4.1	609	3.9	620	2.8	619	8	613	6.3	554	-2.7	571	3.9	586	1.6	572	3	623	11	628	6.6	1677	-0.85	605	6.1
[truncated: 30 more columns]
